# Supplementary material for: Urinary Excretion of N1-methyl-2-pyridone-5-carboxamide and N1-methylnicotinamide in Renal Transplant Recipients and Donors
Source: PubMed Central journal article supplement (PMC7074074; doi:10.3390/jcm9020437), 2020-02-06
Supplement: jcm-09-00437-s001.pdf [file jcm-09-00437-s001.pdf]

## Supplementary Materials

Supplementary Table S1: Associations of 2Py and  $N^1$ -MN excretion with niacin equivalents intake in RTR and kidney donors <sup>1</sup>.

| Variable                                          | RTR<br><i>n</i> = 660 |                 | Kidney donors<br><i>n</i> = 275 |                 |
|---------------------------------------------------|-----------------------|-----------------|---------------------------------|-----------------|
|                                                   | Standardized $\beta$  | <i>p</i> -Value | Standardized $\beta$            | <i>p</i> -Value |
| Niacin equivalents intake, mg/day                 | 35.6 $\pm$ 9.2        |                 | 37.4 $\pm$ 10.8                 |                 |
| 2Py excretion, $\mu$ mol/day                      | 0.22                  | <0.001          | 0.24                            | 0.001           |
| $N^1$ -MN excretion, $\mu$ mol/day                | 0.25                  | <0.001          | 0.29                            | <0.001          |
| Urinary 2Py/ $N^1$ -MN                            | -0.06                 | 0.14            | -0.05                           | 0.52            |
| Sum of 2Py and $N^1$ -MN excretion, $\mu$ mol/day | 0.23                  | <0.001          | 0.27                            | <0.001          |

<sup>1</sup> Linear regression analyses were performed to investigate associations of urinary excretion of 2Py and  $N^1$ -MN with niacin equivalents intake in RTR and healthy kidney donors.  $N^1$ -MN,  $N^1$ -methylnicotinamide; RTR, renal transplant recipients; 2Py,  $N^1$ -methyl-2-pyridone-5-carboxamide; 2Py/ $N^1$ -MN, ratio of 2Py to  $N^1$ -MN.
